# Supplementary material for: Global DNA methylation profiling uncovers distinct methylation patterns of protocadherin alpha4 in metastatic and non-metastatic rhabdomyosarcoma
Source: Springer Nature journal article supplement (doi:10.1186/s12885-016-2936-3), 2016-11-14
Supplement: MOESM1 [file 11044700]

| <b>Cell lines</b> | <b>Karyotype/Gene fusion status</b> | <b>Hystology</b> | <b>Origins</b> |
|-------------------|-------------------------------------|------------------|----------------|
|-------------------|-------------------------------------|------------------|----------------|

---

|             |                                                                                        |           |                                         |
|-------------|----------------------------------------------------------------------------------------|-----------|-----------------------------------------|
| <b>RH4</b>  | t(2;13)(p25;q14);<br>TP53 mutation                                                     | Alveolar  | Lung metastasis 7-year-old female       |
| <b>RH30</b> | t(2;13)(p25;q14);<br>TP53 mutation; amplification of 12q13-15<br>region including CDK4 | Alveolar  | Bone marrow metastasis 16-year-old male |
| <b>RH36</b> | Unknow                                                                                 | Embryonal | Paratesticular relapse 15-year-old male |
| <b>RD</b>   | 51-hyperdiploid; MYC amplification; Q61H<br>mutation of NRAS; TP53 mutation            | Embryonal | Pelvic mass 7-years-old female          |
