# Supplementary material for: Global DNA methylation profiling uncovers distinct methylation patterns of protocadherin alpha4 in metastatic and non-metastatic rhabdomyosarcoma
Source: Springer Nature journal article supplement (doi:10.1186/s12885-016-2936-3), 2016-11-14
Supplement: MOESM2 [file 11044700]

| <b>RMS</b> | <b>Translocation</b> | <b>Gender</b> | <b>Histology</b> | <b>IRS</b>  |
|------------|----------------------|---------------|------------------|-------------|
| RMS1       | PAX3/FOXO1           | Female        | Alveolar RMS     | Group IV    |
| RMS2       | PAX3/FOXO1           | Female        | Alveolar RMS     | Group IV    |
| RMS3       | PAX3/FOXO1           | Male          | Alveolar RMS     | Group IV    |
| RMS4       | NO                   | Female        | Embryonal RMS    | Group IV    |
| RMS5       | PAX3/FOXO1           | Male          | Alveolar RMS     | Group IV    |
| RMS6       | PAX3/FOXO1           | Female        | Alveolar RMS     | Group IV    |
| RMS7       | NO                   | Male          | Alveolar RMS     | Group IV    |
| RMS8       | NO                   | Male          | Embryonal RMS    | Group IV    |
| RMS9       | NO                   | Male          | Embryonal RMS    | Group IV    |
| RMS10      | NO                   | Female        | Alveolar RMS     | Group II a  |
| RMS11      | NO                   | Female        | Alveolar RMS     | Group III a |
| RMS12      | NO                   | Male          | Embryonal RMS    | Group III b |
| RMS13      | NO                   | Male          | Embryonal RMS    | Group III b |
| RMS14      | NO                   | Female        | Embryonal RMS    | Group III a |
| RMS15      | PAX3/FOXO1           | Male          | Alveolar RMS     | Group III a |
| RMS16      | PAX3/FOXO1           | Female        | Alveolar RMS     | Group IV    |
| RMS17      | NO                   | Female        | Embryonal RMS    | Group III a |
| RMS18      | PAX3/FOXO1           | Female        | Alveolar RMS     | Group IV    |
| RMS19      | PAX3/FOXO1           | Female        | Alveolar RMS     | Group IV    |
| RMS20      | PAX3/FOXO1           | Female        | Alveolar RMS     | Group III a |
| RMS21      | NO                   | Male          | Embryonal RMS    | Group II a  |
| RMS22      | PAX7/FOXO1           | Female        | Alveolar RMS     | Group IV    |
| RMS23      | NO                   | Male          | Embryonal RMS    | Group III a |
| RMS24      | NO                   | Female        | Embryonal RMS    | Group III a |
| RMS25      | PAX3/FOXO1           | Female        | Alveolar RMS     | Group III a |
| RMS26      | PAX3/FOXO1           | Male          | Alveolar RMS     | Group III a |
| RMS27      | PAX3/FOXO1           | Female        | Alveolar RMS     | Group IV    |
| RMS28      | NO                   | Male          | Embryonal RMS    | Group IV    |
| RMS29      | NO                   | Male          | Embryonal RMS    | Group III a |
| RMS30      | NO                   | Female        | Embryonal RMS    | Group III a |
| RMS31      | NO                   | Male          | Alveolar RMS     | Group III b |
| RMS32      | PAX7/FOXO1           | Male          | Alveolar RMS     | Group III a |
| RMS33      | PAX7/FOXO1           | Male          | Alveolar RMS     | Group III a |
| RMS34      | NO                   | Male          | Alveolar RMS     | Group III a |
| RMS35      | NO                   | Male          | Alveolar RMS     | Group III b |
| RMS36      | NO                   | Female        | Embryonal RMS    | Group III a |
| RMS37      | NO                   | Female        | Embryonal RMS    | Group III a |
| RMS38      | NO                   | Female        | Embryonal RMS    | Group III a |
| RMS39      | NO                   | Male          | Embryonal RMS    | Group III a |
| RMS40      | PAX7/FOXO1           | Female        | Alveolar RMS     | Group III a |
| RMS41      | PAX3/FOXO1           | Female        | Alveolar RMS     | Group IV    |
| RMS42      | NO                   | Female        | Alveolar RMS     | Group III a |
| RMS43      | PAX7/FOXO1           | Female        | Alveolar RMS     | Group III a |
| RMS44      | NO                   | Male          | Embryonal RMS    | Group III a |
| RMS45      | PAX3/FOXO1           | Male          | Alveolar RMS     | Group IV    |
| RMS46      | PAX3/FOXO1           | Female        | Alveolar RMS     | Group IV    |
| RMS47      | NO                   | Male          | Embryonal RMS    | Group III   |
| RMS48      | NO                   | Female        | Embryonal RMS    | Group III a |
| RMS49      | NO                   | Male          | Embryonal RMS    | Group III b |
| RMS50      | NO                   | Male          | Embryonal RMS    | Group III a |
| RMS51      | PAX3/FOXO1           | Female        | Alveolar RMS     | Group III a |
| RMS52      | NO                   | Male          | Embryonal RMS    | Group III a |
| RMS53      | PAX3/FOXO1           | Male          | Alveolar RMS     | Group III a |
| RMS54      | PAX3/FOXO1           | Male          | Alveolar RMS     | Group IV    |
| RMS55      | PAX3/FOXO1           | Female        | Alveolar RMS     | Group IV    |

|       |            |        |               |             |
|-------|------------|--------|---------------|-------------|
| RMS56 | NO         | Female | Alveolar RMS  | Group III a |
| RMS57 | NO         | Female | Embryonal RMS | Group IV    |
| RMS58 | PAX3/FOXO1 | Female | Alveolar RMS  | Group IV    |
| RMS59 | PAX7/FOXO1 | Male   | Alveolar RMS  | Group III a |
| RMS60 | NO         | Male   | Embryonal RMS | Group III a |
| RMS61 | NO         | Female | Alveolar RMS  | Group III a |

\* RMS cases analyzed by array

IRS Clinical grouping classification
